# Supplementary material for: Overexpression of an Antioxidant Enzyme APX1 in cpr5 Mutant Restores its Pleiotropic Growth Phenotype
Source: MDPI journal article supplement (doi:10.3390/antiox12020301), 2023-01-28
Supplement: s1 [file s1]

## Supplemental Figures

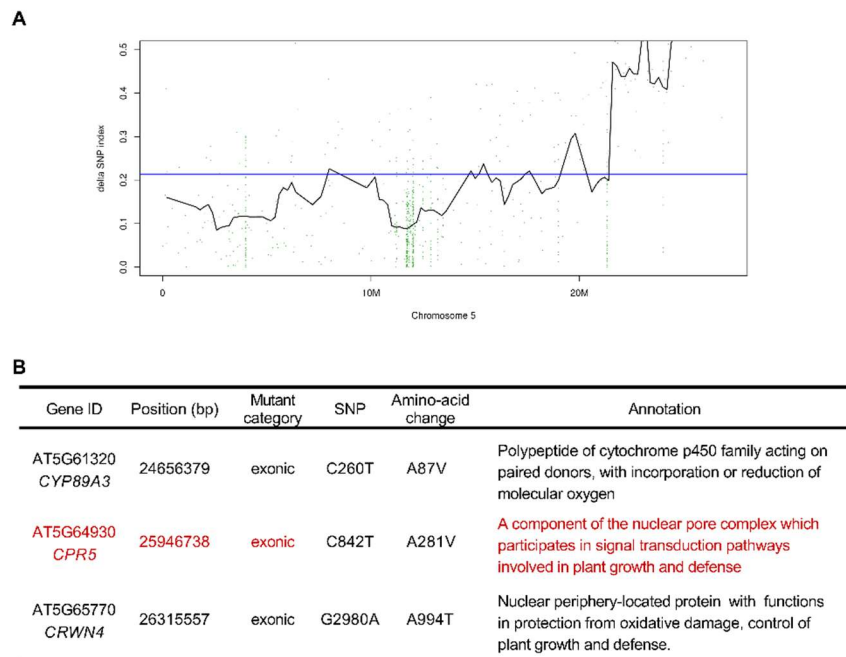

**Figure S1. Molecular characterization of *DELT9*.** (A)  $\Delta$ SNP-index plot of *Chr5* generated by whole-genome sequencing. Green dots correspond to each  $\Delta$ SNP-index. The black line represents the average  $\Delta$ SNP-index at 1-Mb intervals with 100-kb increments. The candidate region is above the blue line indicating cutoff values. (B) List of candidates. Three nonsynonymous SNPs were identified in the candidate regions.

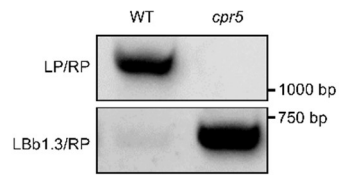

**Figure S2. Genotyping of *cpr5* T-DNA insertion mutants.** *cpr5* homozygotes were identified by PCR. The primers used for amplification are listed in Table S1.

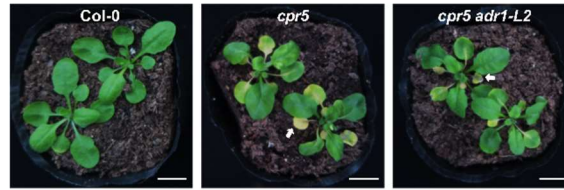

**Figure S3. Mutation of ADR1-L2 does not suppress the premature leaf senescence in *cpr5*.** Representative photographs of 4-wk-old plants. White arrows indicate early senescence leaves. Scale bars, 1 cm.

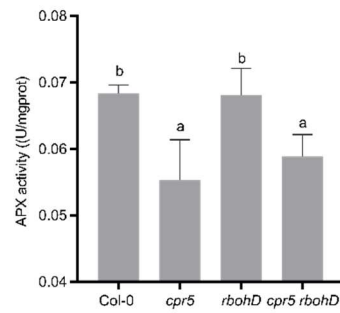

**Figure S4. Introduction of *rbohD* into *cpr5* did not recover the reduced APX activity.** APX activity was measured in the 5<sup>th</sup>–7<sup>th</sup> rosette leaves from 4-wk plants. Data are the mean  $\pm$  SD (n = 4). Letters above bars indicate significantly different values among groups ( $P < 0.05$ ; one-way ANOVA). The experiment was performed twice with similar results each time.

**Table S1. Primers used in this study**

| Primer name    | Sequence (5' to 3')                                  | Function                             |
|----------------|------------------------------------------------------|--------------------------------------|
| Salk_074631 LP | TTGTTGCAGTGATAGCACCAG                                | Genotyping for cpr5 T-DNA homozygote |
| Salk_074631 RP | TTTGGGTGCAGATATTTTTCG                                |                                      |
| LBb1.3         | ATTTTGCCGATTTCGGAAC                                  | T-DNA genotyping                     |
| CPR5-GW-F      | GGGGACAAGTTTGTACAAAAAAGCAGGCTACATGGAAGCCCTCCTCCTCCCT | Cloning for 35S::CPR5-3×HA           |
| CPR5-GW-R      | GGGGACCACTTTGTACAAGAAAGCTGGGTCAGCATAGTCAGACCCACCAT   |                                      |
| WRKY25-qF      | GGTTGTGGAGTGAAGAAGCA                                 | qRT-PCR                              |
| WRKY25-qR      | TCGTGATTGTGTCTTCCTTCA                                |                                      |
| WRKY53-qF      | TCACCGAGCGTACAACCTTATTCC                             |                                      |
| WRKY53-qR      | CGTTTATCGATGCCGGAGATT                                |                                      |
| WRKY75- qF     | CCGTCAAGAACAACAAGTTCCC                               |                                      |
| WRKY75- qR     | TATGCTCGAAGTTTTCGGTGGA                               |                                      |
| GSTF2- qF      | CCAGCTTCCGAGAAGGTTCAGTG                              |                                      |
| GSTF2- qR      | GCCAAAGATACTCTCAAGAGCATAAC                           |                                      |
| GSTF3- qF      | CTTTGAGCTCGTTCATGTTGAA                               |                                      |
| GSTF3- qR      | TTCGTATCGGTGAGCTATGTAC                               |                                      |
| GSTF7- qF      | TGAAGATGGAGACTTCAAGCTT                               |                                      |
| GSTF7- qR      | CATGCGATTCAATTTCAATGCC                               |                                      |
| AOX1a- qF      | GTTTCAGGCCATGGGAAACG                                 |                                      |
| AOX1a- qR      | CAAGAAACGTCGTTGGAACATGA                              |                                      |
| AOX1d- qF      | CCAAATGGTACGAACGAGCG                                 |                                      |
| AOX1d- qR      | ACGATGAGCAAGTTTGGGTGA                                |                                      |
| MDAR3- qF      | CTGAAGCCTGGTGAACCTCGC                                |                                      |
| MDAR3- qR      | GGTCGGATTGACTTCGAGGTC                                |                                      |
| SAG13- qF      | GGGCTTGGGAGAGAACTCAA                                 |                                      |

|           |                     |  |
|-----------|---------------------|--|
| SAG13- qR | TGGCTAGTTCCTCCACCAC |  |
|-----------|---------------------|--|
